# Supplementary material for: AARS2 ameliorates myocardial ischemia via fine-tuning PKM2-mediated metabolism
Source: eLife journal article supplement (doi:10.7554/elife.99670), 2024-08-15

Western blot analysis showing AARS2 and  $\beta$ -actin protein levels. The top panel shows AARS2 protein levels, with a red box highlighting the bands for AARS2<sup>WT</sup> and AARS2<sup>Tg/+</sup> mice. The bottom panel shows  $\beta$ -actin protein levels, with a red box highlighting the bands for AARS2<sup>WT</sup> and AARS2<sup>Tg/+</sup> mice. Molecular weight markers are indicated on the right (130, 100, 55, 40 kDa).

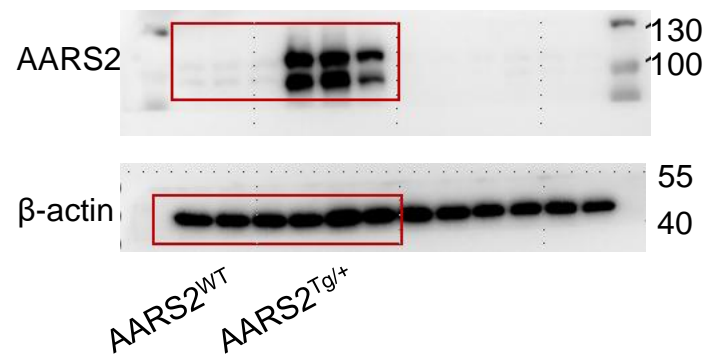

Supplement: fig3-data1 [file elife-99670-fig3-data1-v1.zip]
