# Supplementary figures and images for: AARS2 ameliorates myocardial ischemia via fine-tuning PKM2-mediated metabolism
Source: eLife journal article supplement (doi:10.7554/elife.99670), 2024-08-15

Figure 1A

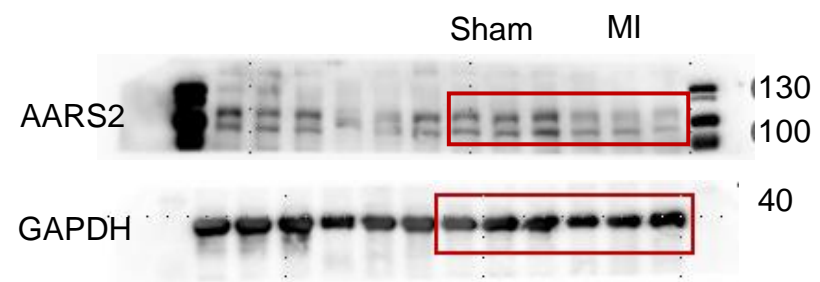

Figure 1D

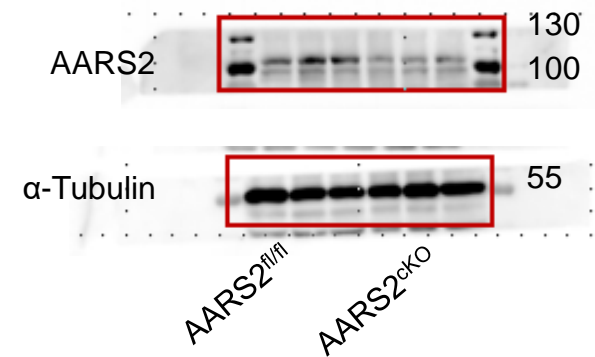

Supplement: fig1-data1 [file elife-99670-fig1-data1-v1.zip]

Figure 2B

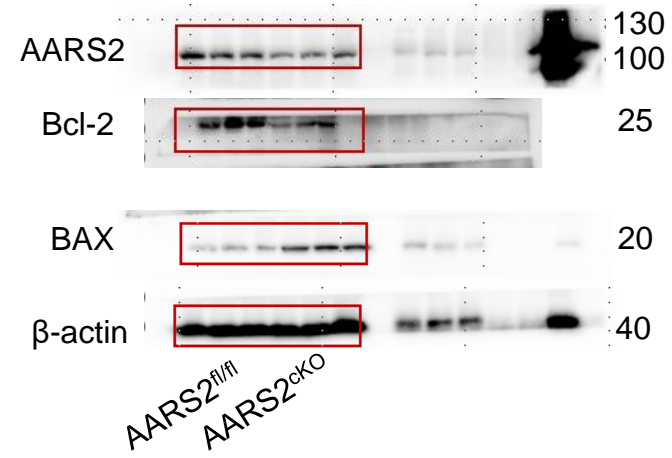

Supplement: fig2-data1 [file elife-99670-fig2-data1-v1.zip]

Figure 2–figure  
supplement 1A

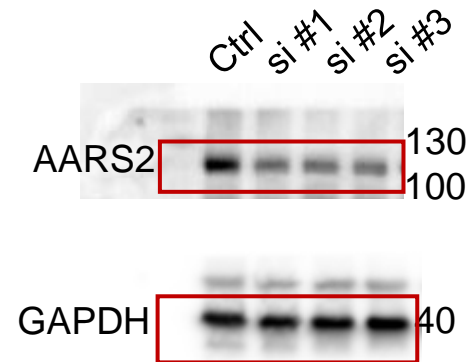

Figure 2–figure  
supplement 1B

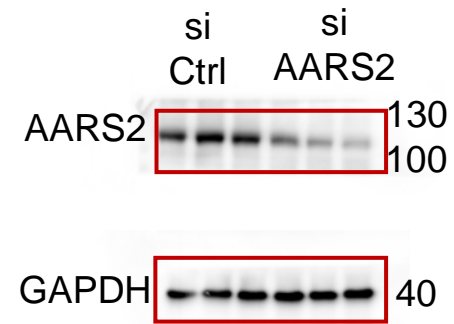

Supplement: fig2-figsupp1-data1 [file elife-99670-fig2-figsupp1-data1-v1.zip]

Figure 3—figure supplement 1A

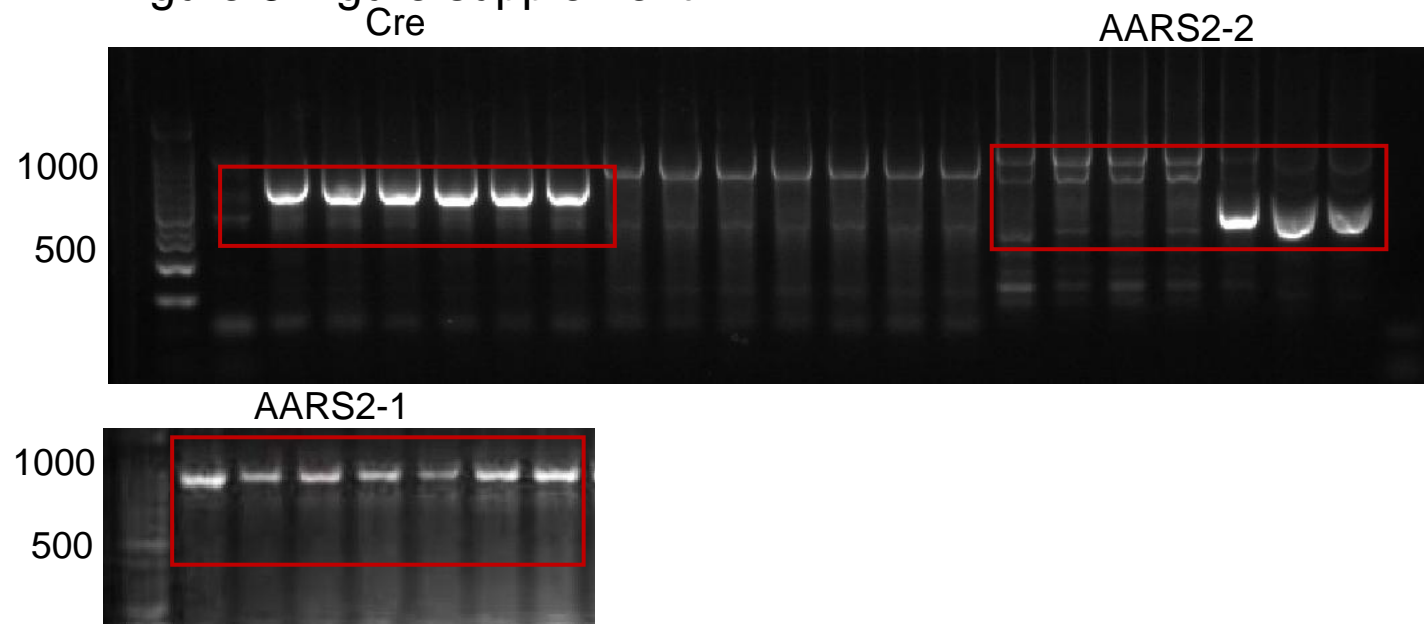

Figure 3—figure supplement 1B

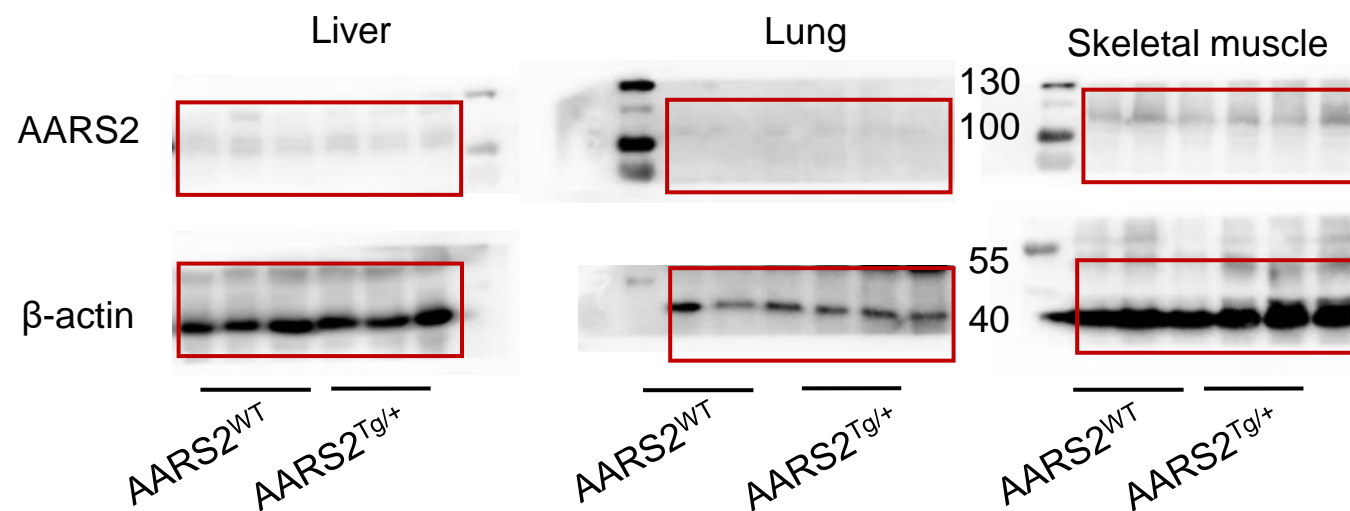

Supplement: fig3-figsupp1-data1 [file elife-99670-fig3-figsupp1-data1-v1.zip]

Figure 4B

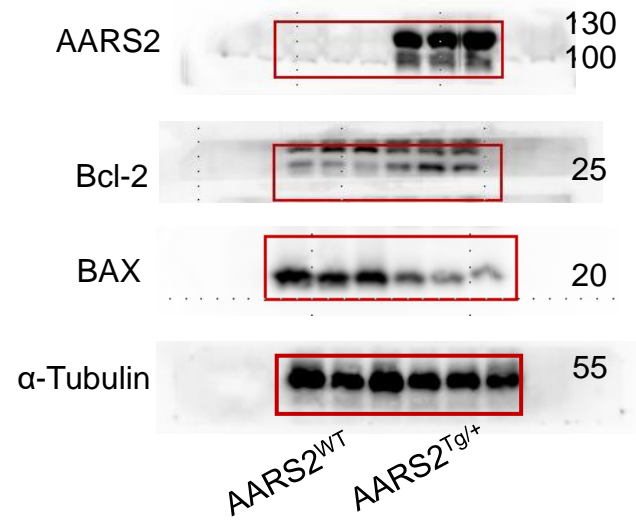

Figure 4E

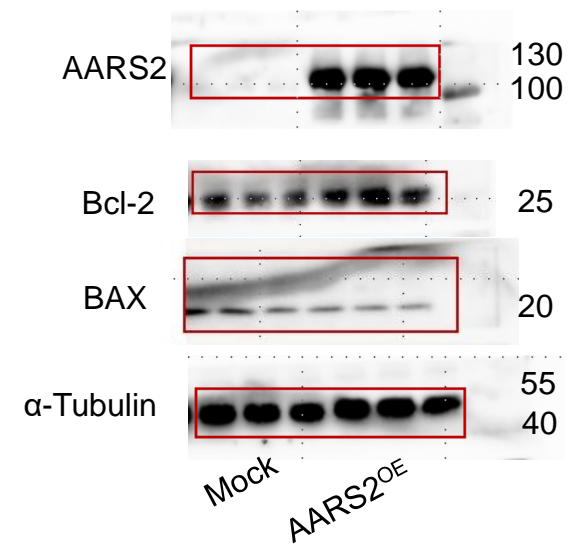

Supplement: fig4-data1 [file elife-99670-fig4-data1-v1.zip]

Figure 6B

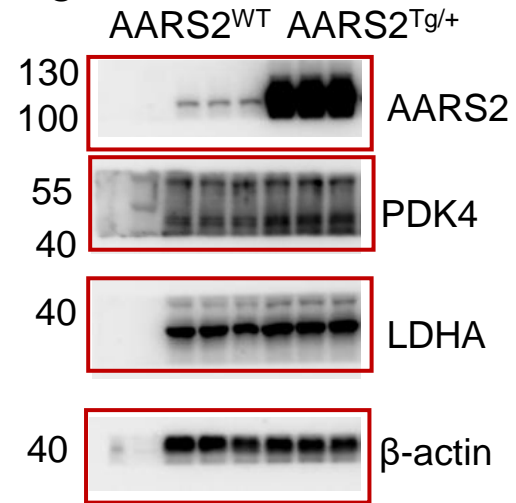

Figure 6C

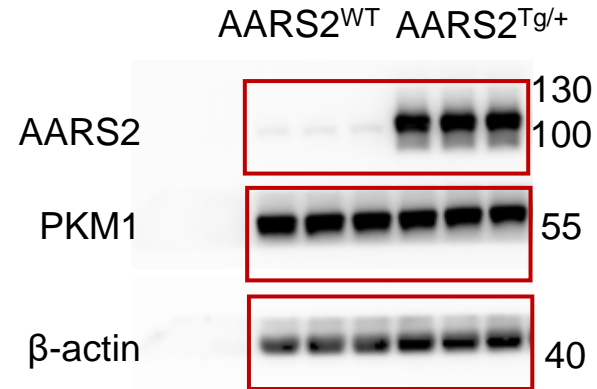

Figure 6D

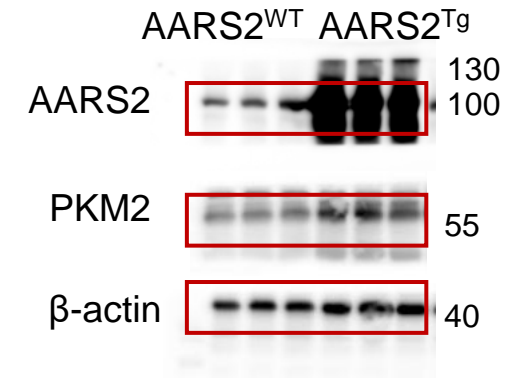

Figure 6E

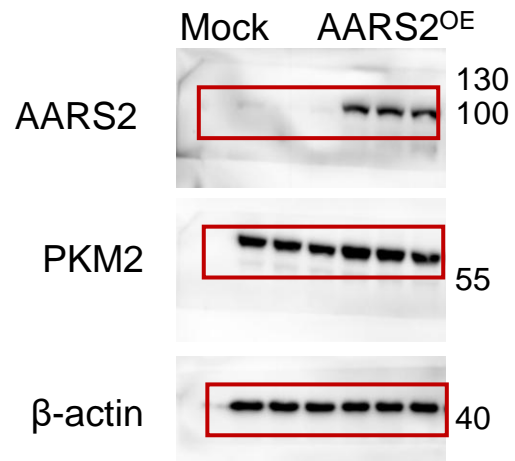

Figure 6F

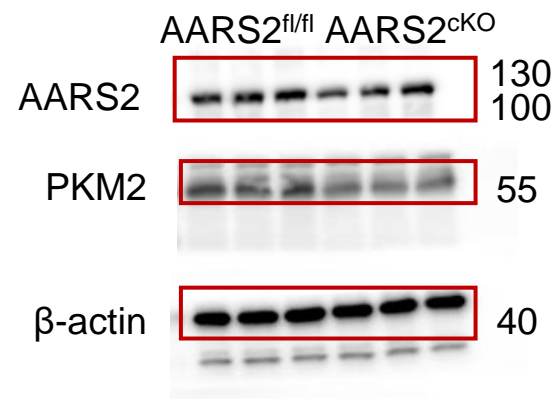

Figure 6G

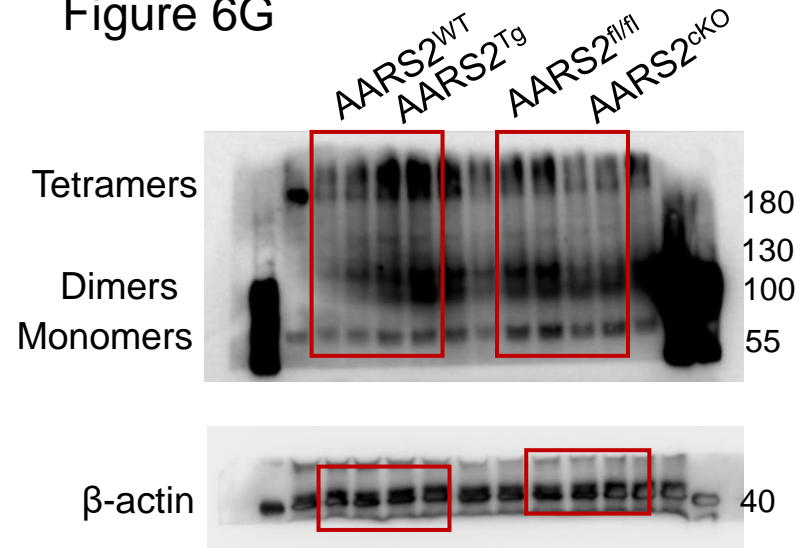

Figure 6K

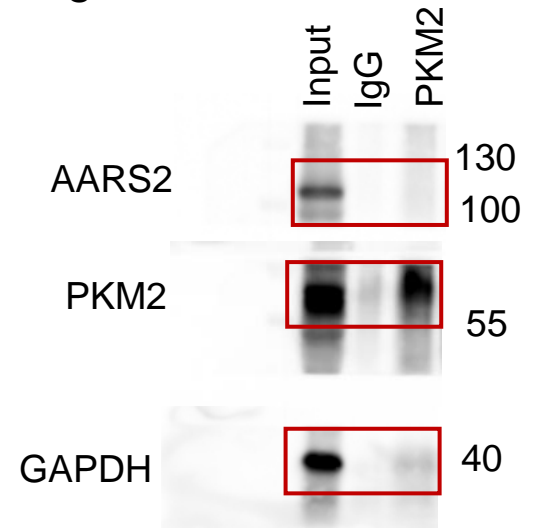

Supplement: fig6-data1 [file elife-99670-fig6-data1-v1.zip]
